26 colouration evolved into a private communication channel, which could have significantly  
27 lowered signalling costs for males; b) that claw colouration is conspicuous to potential  
28 reproductive partners, as well as to predators, making colour signalling by males very costly  
29 (i.e., a handicap). Thereafter, we measured the reflectance spectra from several enlarged claws  
30 and modelled their chromatic contrast against the background spectrum, considering the visual  
31 systems of conspecific fiddler crabs and two kinds of predators (terns and plovers). We also  
32 tested female conspecifics' preference towards enlarged claws that reflected UV-light or other  
33 colour cues, by artificially altering claw colouration. Our results show a clear female preference  
34 for UV reflecting males. We also found that natural enlarged claws should be highly detectable  
35 by avian predators, refuting the private communication channel hypothesis. Furthermore, since  
36 female fiddler crabs select the most flamboyant claws from the sandy background, claw  
37 colouration in fiddler crabs can be understood as an honest signal.

38 **Keywords:** Animal communication; terns; plovers; colour vision; handicap principle;  
39 ocypodidae; runaway selection; signal honesty; spectrophotometry; ultraviolet signal.

40

41

## 42 HIGHLIGHTS

- 43 1) The hypertrophied claws of male *Leptuca leptodactyla* reflect UV light.
- 44 2) Female fiddler crabs display a natural preference for UV light cues.
- 45 3) Conspicuous claws function as handicaps and may honestly signal individual quality.
- 46 4) Male enlarged claws are more conspicuous to birds than to crabs.
- 47 5) Our data refute the presence of a private communication channel in *L. leptodactyla*.

48

49

50

## 51 INTRODUCTION

52 The evolution of animal colouration has been associated with numerous functional  
53 drivers, such as social signalling, antipredator defence, parasitic exploitation,  
54 thermoregulation, and protective colouration (Cuthill et al. 2017). Among these drivers, the use  
55 of colour signals for intra and interspecific recognition, intrasexual competition, and mate  
56 choice have received special attention from researchers that study different animal taxa  
57 (Higham and Winter 2015). Yet, when we consider the study of the functional significance of  
58 colouration, an especially colourful group that has received far less attention, at least when  
59 compared to other arthropods (e.g., insects and spiders), is Brachyura (crabs) (Caro 2018), a  
60 promising taxon on which to test some key evolutionary drivers of external appearance (Zeil  
61 and Hemmi 2006; Caro 2018).

62 Among Brachyura, fiddler crabs have attracted the scientific interest for some time,  
63 and, for that matter, it is a group that already offers a substantial theoretical framework on  
64 which working hypotheses may be formulated. To wit, literature has established these animals  
65 present an array of agonistic and sexual visual displays based on size (Oliveira and Custodio  
66 1998), posture (Schöne 1968; Murai and Backwell 2006), movement (Byers et al. 2010) and  
67 colour (Detto 2007) cues. Such visual cues are thought to relay information concerning  
68 individual reproductive status (Crane 1975) and quality (Latruffe et al. 1999), and to allow intra  
69 and interspecific recognition (Dyson et al. 2020).

70 Typically, male fiddler crabs have a brightly coloured (Dyson and Backwell 2016) and  
71 hypertrophied claw that can be used either as a weapon, in male-male disputes, or as an  
72 ornament, for female attraction (Crane 1975). Since fiddler crabs express two different kinds  
73 of visual pigments, which are responsible for absorbing light in the UV (300-400 nm) and  
74 visible (400-700 nm) light range (Horch et al. 2002; Jordão et al. 2007), they are expected to  
75 see UV cues and to show a dichromatic colour discrimination (Jacobs 2018). Behavioural

76 experiments, conducted on banana fiddler crabs (*Austruca mjoebergi*), suggest that colour (UV  
77 light included), but not brightness, is important for conspecific reckoning and mate choice  
78 (Detto et al. 2006; Detto 2007; Detto and Backwell 2009; Dyson et al. 2020).

79         The adaptive value of UV light reflection in fiddler crabs, however, is still poorly  
80 understood and might be attributed to different ecological interactions. For instance, Detto and  
81 Backwell (2009) hypothesize that, if UV reflection enhances male conspicuity, increasing their  
82 detectability by female fiddler crabs, the trait should have been fixed in the population. On one  
83 hand, the argument of Detto and Backwell (2009) seems to follow Fisher's runaway selection  
84 hypothesis (see Henshaw and Jones 2020), according to which a secondary sexual trait  
85 expressed in one sex should become correlated with a preference for the trait in the other sex.  
86 On the other hand, UV reflection could also be understood as a handicap that attracts the  
87 attention of predators and warrants signal honesty about individual quality to reproductive  
88 partners (Zahavi 1975). Bright colourations (which also include UV reflection) has been  
89 pointed out as honest indicators of low parasite loads (Hamilton and Zuk 1982) or, in a more  
90 general sense, good genes (Andersson et al. 1998). Yet, these possibilities remain to be tested  
91 in fiddler crabs.

92         Another explanation is that ultraviolet reflection could also result from a trade-off  
93 between the advantages of intraspecific conspicuous signalling and the disadvantages of  
94 predator attraction (Hemmi et al. 2006; Cummings et al. 2008). Fish subjected to these  
95 conditions have been reported to develop UV light reflection, which could yield a private  
96 communication channel (i.e., wherein a species produces a signal that is detected by  
97 conspecifics but not predators; see Cummings et al. 2003). In fiddler crabs' list of predators,  
98 we usually find many bird species, which detect UV light very well, such as plovers (Ribeiro  
99 et al. 2003) and terns (Land 1999).

100           Recently, a taxonomic review of family Ocypodidae Rafinesque, 1815 (Crustacea:  
101 Brachyura) divided fiddler crabs' former taxon (i.e., *Uca*) in 11 different genera (Shih et al.  
102 2016). The endemic genera from the Americas (*Leptuca*, *Minuca*, *Petruca* and *Uca*) now  
103 encompass 57 species, approximately 55% of fiddler crabs' current species. Among all 104  
104 fiddler crab species, only four (*Afruca tangeri*, *Austruca mjoebergi*, *Tabuca signata* and  
105 *Tabuca capricornis*), from Europe/Africa and Australia, already had the utility of their claw  
106 colouration examined (Cummings et al. 2008; Detto et al. 2006; Detto 2007; Detto and  
107 Backwell 2009; Dyson et al. 2020). More surprisingly, *Leptuca*, fiddler crabs' most heavily  
108 studied taxon (Nabout et al. 2010), and the richest genus in Ocypodidae family, enclosing  
109 almost one third of all fiddler crab species (i.e., 30 species according to Shih et al. 2016), has  
110 not yet been explored with respect to the ecological pressures shaping its claw colouration.

111           Hence, at first, we test two competing hypotheses regarding the functional significance  
112 of fiddler crabs' enlarged claw colour, using *Leptuca leptodactyla* as an experimental model.  
113 (I) We hypothesize that hypertrophied claw colouration plays a part in a private communication  
114 channel, through which fiddler crabs exchange social/reproductive signals that are not  
115 detectable by their predators. We predict our results will show that colour contrast between  
116 enlarged claws and the sandy background is significantly perceptible to fiddler crabs' visual  
117 system, while imperceptible to the visual systems of their potential predators. (II) As an  
118 alternative hypothesis, we propose that the conspicuity of enlarged claws works as a handicap  
119 (see Zahavi 1975), imposing to male fiddler crabs the heavy cost of enhancing predator  
120 attraction, while also honestly advertising their presence and quality to potential female mates.  
121 In this case, we predict our results will show the more noticeable an enlarged claw is for a  
122 reproductive partner, the more conspicuous it should also be for predators.

123           In addition, we also test a third hypothesis regarding the role that UV light reflectance  
124 exerts on female mate choice. (III) We hypothesize that UV reflection from enlarged claws will

125 be the major colour signal considered by females in their decision making. In case our third  
126 hypothesis is correct, we expect our behavioural results to demonstrate females prefer males  
127 that reflect UV light, as already shown for Australian species (Detto and Backwell 2009).

128

## 129 **METHODS**

### 130 *Choice of Study Species and Study Site*

131 Just a few reports have examined the biology of the thin-fingered fiddler crabs (*Leptuca*  
132 *leptodactyla*; Figure 1) (Nabout et al. 2010), which populations spread throughout the Western  
133 Atlantic: Caribbean, Venezuela to Brazil, eastern Yucatan Peninsula (Mexico), south-eastern  
134 Florida (USA). The present study took place at a mangrove area, in which a population of thin-  
135 fingered fiddler crabs (*L. leptodactyla*) naturally occurs, showing a rainy tropical climate, with  
136 rains extending from February to September, and temperatures ranging from 21°C (min.) to  
137 30°C (max.), with a mean temperature of 26°C, and predominant vegetation comprised of  
138 sandy coastal plains and mangroves. The area is located within a hydrographic basin, in which  
139 unconsolidated sand and gravel composes the fluvial flatland, that is subject to periodical  
140 flooding. At the study site, substrate becomes exposed during the low tides, revealing hundreds  
141 of burrows, in which *L. leptodactyla* and other crab species live.

### 142 *Mate Choice Experiments*

143 We conducted experiments throughout the low tides, and our experimental procedures  
144 were adapted from Detto et al. (2006), Detto (2007) and Detto and Backwell (2009). Before  
145 the beginning of each experimental session, we delimited a squared shaped arena (30 cm<sup>2</sup>) on  
146 the same sandy substrate in which the animals built their burrows, foraged and mate. For that,  
147 we displaced all the animals, obstructed their burrows, and drew a square in the sand.

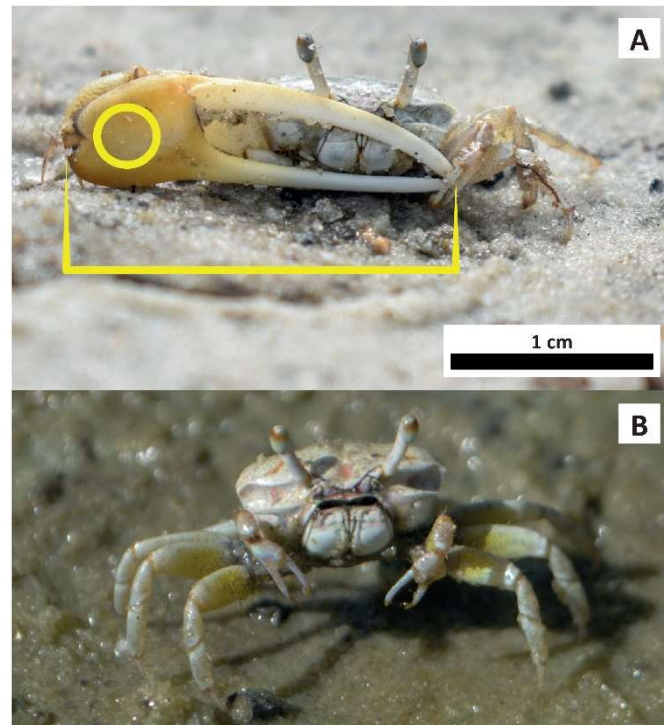

148 Figure 1. Male (A) and female (B) specimens of thin-fingered fiddler crabs (*Leptuca leptodactyla*). Yellow  
149 callipers indicate how male hypertrophied claws were sized, while the yellow circle indicates where the  
150 reflectance spectra (colour) of male hypertrophied claws were measured.

151

152 Then, we captured a few male fiddler crabs (*L. leptodactyla*) and measured the length  
153 (Figure 1) of their hypertrophied claws (chelae) with a calliper, from the base of their palm  
154 (propodus) to their fingertip (dactyl), assigning the crabs to different groups according to their  
155 claw's size. The maximal acceptable intragroup difference was established at 0.1 cm. From a  
156 same group, we randomly chose a set of four size-matched male crabs and subjected each  
157 animal to one of the experimental treatments described in Table 1. We decided to use white,  
158 yellow, and orange paints because white is *L. leptodactyla*'s carapace colour, while different  
159 shades of yellow and orange are the most frequent colouration found on their hypertrophied  
160 claws. We also decided to use blue paint to represent a kind of unfamiliar colour that is not  
161 expressed by *L. leptodactyla*, or any other species found in the same crab community, but that  
162 can be found on species of fiddler crabs of other geographical regions. In experiment 1,  
163 irrespective of their experimental treatment, males' posterior carapaces were also treated with

164 white paint and/or sunblock (Table 1), to control for any chemical cues that could be  
165 transmitted to the females. Males' posterior carapaces were not viewable from females'  
166 location.

167

168 Table 1. Treatments to which male thin-fingered fiddler crabs (*Leptuca leptodactyla*) were assigned in  
169 experiments 1 and 2. All paints were acquired from Acrilex (Matte Ink for Crafts) and sunblock was acquired  
170 from Natura (Fotoequilibrio SPF 60).

| Experimental group | Treatment (claw) |                     | Treatment (posterior carapace) |             |
|--------------------|------------------|---------------------|--------------------------------|-------------|
|                    | Sunblock         | Paint               | Sunblock                       | White paint |
| Experiment 1       |                  |                     |                                |             |
| Control            | No               | No                  | Yes                            | Yes         |
| Sunblock           | Yes              | No                  | No                             | Yes         |
| White claw         | No               | White paint         | Yes                            | No          |
| Yellow claw        | No               | Bright yellow paint | Yes                            | No          |
| Experiment 2       |                  |                     |                                |             |
| White claw         | No               | White paint         | No                             | No          |
| Yellow claw        | No               | Yellow ochre paint  | No                             | No          |
| Orange claw        | No               | Orange paint        | No                             | No          |
| Blue claw          | No               | Blue paint          | No                             | No          |

171

172 Once painted by the experimenters, males were attached to nylon threads through their  
173 posterior carapaces, with superglue, while the other end of the threads were tied to nails,  
174 anchoring the crabs to the arena's substrate, one male crab at each corner, facing each other, at  
175 12 cm from the centre. Anchoring prevented males from moving, but still allowed them to  
176 move their locomotory appendages and to wave their claws, although waving displays  
177 following capture were not observed. We always randomized treatment positioning between  
178 different sets of size-matched males.

179 Consecutively, we captured a female crab (*L. leptodactyla*), placed it at the centre of  
180 the arena, under a transparent cup, and kept it there, habituating, for one minute. After  
181 habituation, we lifted the cup and observed the female's behaviour for three minutes, unless it



182 spent less time making a valid choice (i.e., slowly approaching a male by less than two  
183 centimetres) or evading the arena. We considered females to have evaded the arena when, as  
184 soon as the cup was lifted, they quickly ran towards one of the males and left the arena, or they  
185 left the arena without approaching any male. Females that spent three minutes without making  
186 a valid choice or evading the arena were replaced by another one. Females were tested only  
187 once, being freed right away, however, each set of four size-matched males was presented to  
188 several females, until we recorded three female valid choices. After that, the set of males was  
189 released and replaced by a new group of four sized-matched males, and so on. Prior to their  
190 liberation, males were released from their nylon threads.

191 In experiment 1, we tested if females choose male conspecifics according to the  
192 presence of UV reflection. While in experiment 2, we tested if females showed any sensory  
193 bias towards any specific claw colouration (e.g., acquainted, and unacquainted colours),  
194 irrespective of UV cues. In experiment 1 we used 20 groups of males (totalling 80 males) and  
195 a total of 206 females (146 evasions and 60 female choices), while in experiment 2 we used 20  
196 groups of males (80 males), having tested a total of 168 females (108 female evasions and 60  
197 female choices). These sample sizes are in accordance with what has been established by  
198 previous published studies (Detto et al. 2006; Detto 2007; Detto and Backwell 2009).

199 Our research protocol adheres to the ASAB/ABS guidelines for the use of animals in  
200 research and is in accordance with institutional guidelines and local legislation.

### 201 *Spectral Measurements*

202 We used a USB4000-UV-VIS (Ocean Optics, Inc.) spectrophotometer connected to a  
203 light source (DH2000-BAL; Ocean Optics, Inc.) through a bifurcated optic probe (QR450-7-  
204 XSR; Ocean Optics, Inc.). The tip of the optic probe was coupled to a custom-made probe  
205 holder, to reduce the sampling area (1 mm of diameter; Appendix 1). The system was calibrated  
206 using a WS-1-SL (Ocean Optics, Inc.), as the white standard, and by turning the light source

207 off, as the black standard. All measurements were taken at a fixed angle (90°) and distance (5  
208 mm) from stimuli, with help of the SpectraSuite software (Ocean Optics, Inc.), in which boxcar  
209 width and number of spectra averaged were set to 5 and 10, respectively.

210 Forty male fiddler crabs were, randomly, collected in the study area and brought to the  
211 laboratory, to have the natural colour of their hypertrophied claws registered (Figure 1). These  
212 data confirmed that the chosen population reflected UV light, and established that there was a  
213 natural variation among hypertrophied claw spectra. Using a shovel, we collected a sample of  
214 the study site's sediment and carefully carried it to the laboratory to avoid disaggregation. Using  
215 the above-mentioned procedure, we also measured the reflectance spectrum of the outmost  
216 sediment layer (Figure 2).

217 In a subsequent opportunity, in order to characterize the effect that each experimental  
218 treatment (Table 1) had on the reflectance spectra of male claws, we captured six additional  
219 crabs, measured their natural colouration, as described previously, and covered their  
220 hypertrophied claws with one of the following products: 1) sunblock (Natura Fotoequilibrio  
221 SPF 60); 2) white paint (Matte Ink for Crafts, Acrilex); 3) bright yellow paint (Matte Ink for  
222 Crafts, Acrilex); 4) yellow ochre paint (Matte Ink for Crafts, Acrilex); 5) orange paint (Matte  
223 Ink for Crafts, Acrilex); 6) blue paint (Matte Ink for Crafts, Acrilex). Males' claw colourations  
224 were remeasured after treatment (Figure 3). All paints completely blocked UV light  
225 reflectance, in the same way sunblock did.

### 226 *Visual Modelling*

227 To determine how fiddler crabs and their predators (e.g., terns and plovers) visualize  
228 the colouration of male claws against the sandy substrate, we applied the receptor noise (RNL)  
229 model of colour discrimination (Vorobyev and Osorio 1998) to determine the chromatic  
230 contrasts ( $\Delta S$ ) between the reflectance spectrum of the sandy background and claws' natural  
231 colourations, according to the visual system of fiddler crabs and birds. It is important to note

232 that the RNL model only considers chromatic information, disregarding achromatic cues.  
233 Modelling was conducted in pavo 2.0 (Maia et al. 2019), a R package for spectral analysis of  
234 colour.

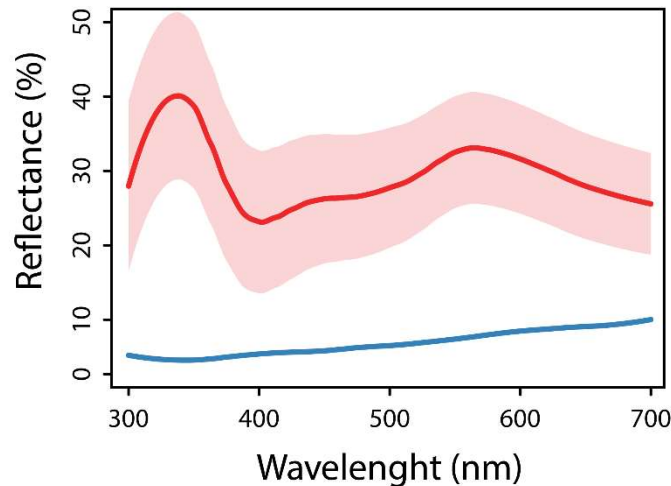

235 Figure 2. Natural reflectance spectra measured from a set of 40 male thin-fingered fiddler crabs' (*Leptuca*  
236 *leptodactyla*) hypertrophied claws. Average spectrum and variation (maximal and minimum values) are indicated  
237 by the red line and its adjoining shaded pink area, respectively. The blue line represents the sandy background  
238 reflectance spectrum.

239

240 Initially, we estimated the absolute amount of light captured by the photoreceptors of  
241 each observer (' $Q_i$ ' – quantum catch), considering three factors: 1) the reflectance spectrum of  
242 the object (i.e., male claw) or background (i.e., sandy substrate); 2) the illuminant spectrum of  
243 incident light (i.e., natural light shining on the study site); 3) the observer's visual sensitivity  
244 curves. We compared the natural reflectance spectra collected from 40 animals, as described  
245 previously, with the reflectance spectrum collected from the sandy background (Figure 2). A  
246 standard daylight illuminant spectrum (i.e., illum = 'D65'), provided by pavo 2.0's library, was  
247 used. Since estimation of receptor sensitivities do not affect model results too seriously (Olsson  
248 et al. 2018), and because birds show two general colour vision phenotypes, those containing  
249 ultraviolet sensitive (UVS) cone photoreceptors and others containing violet sensitive (VS)

250 cone photoreceptors, we used available spectral sensitivities from the Atlantic Mangrove  
251 Fiddler Crab (*Leptuca thayeri*: 430 nm, 520 nm; Horch et al. 2002), the Blue Tit (*Cyanistes*

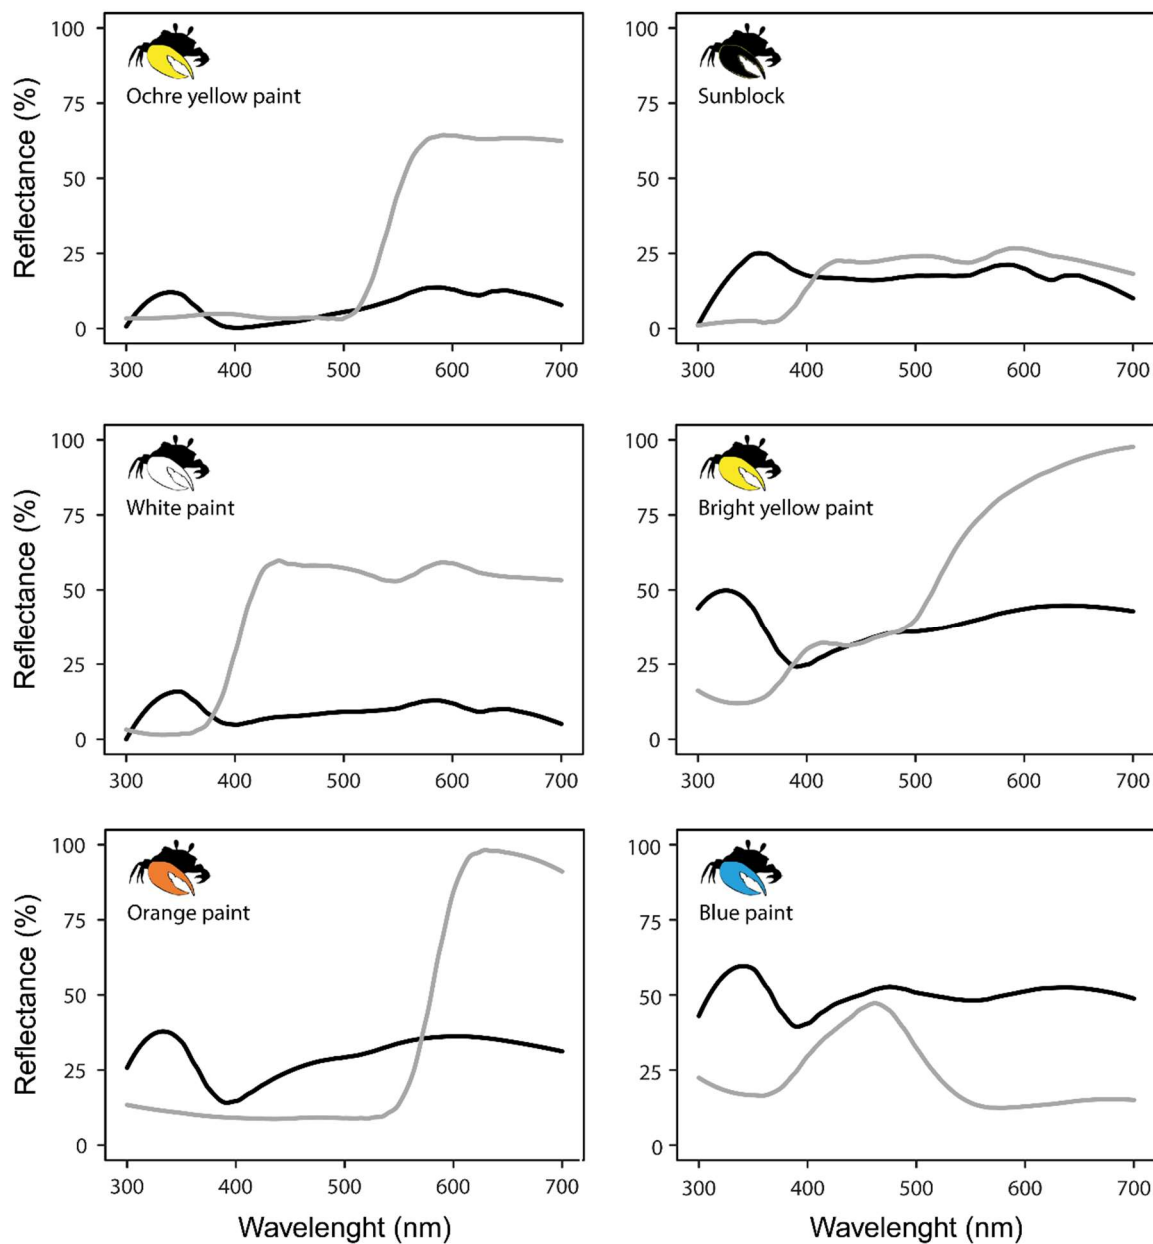

252 Figure 3. Reflectance spectra measured from the enlarged claws of six male thin-fingered fiddler crabs (*Leptuca*  
253 *leptodactyla*) subjected to different experimental treatments (detailed in Table 1). Natural spectra (before  
254 treatment) are represented by black lines, while grey lines indicate claws' spectra after treatments.

255

256 *caeruleus*: 372 nm, 453 nm, 539 nm, 607 nm; Hart and Hunt 2007) and the Peafowl (*Pavo*  
257 *cristatus*: 424 nm, 479 nm, 539 nm 607 nm; Hart and Hunt 2007), as proxies for fiddler crab's,

258 tern's, and plover's visual systems, respectively. For the visual system of crabs we set *trans* =  
259 'ideal', while for terns we used *trans* = 'bluetit' (Hart et al. 2000). For plovers, we supplied  
260 *trans* as vector containing the ocular transmission spectra of *Pavo cristatus* (Hart 2002). Since  
261 we required absolute quantum catches, instead of relative quantum catches, we set *relative* =  
262 FALSE. We set the remaining parameters to default (i.e., *vonkries* = FALSE, *scale* = 1).

263 In addition, when calculating the chromatic contrasts ( $\Delta S$ ) for each kind of observer,  
264 we ran the RNL model and compared  $Q_i$  information of each individual crab with that of the  
265 sandy background, setting parameters to default (i.e., photoreceptor noise set as 'neural',  
266 *weber.ref* = 'longest') and including specific cone densities and photoreceptor noise values  
267 (i.e., *weber* fractions) for the visual systems of each modelled observer. For tern's visual system  
268 we employed [*n* = c(1:1.9:2.7:2.7); based on *Cyanistes caeruleus* (Hart et al. 2000)], and for  
269 plover's visual system we used [*n* = c(1:1.9:2.2:2.1); based on *Pavo cristatus* (Håstad et al.  
270 2005)], applying pekin robin's (*Leiothrix lutea*) *weber* = 0.1 (Maier and Bowmaker 1993) to  
271 both avian visual systems. Following previous publications (Hemmi et al. 2006; Cummings et  
272 al. 2008), for modelling fiddler crab's visual system we applied honeybee's (*Apis mellifera*)  
273 *weber* = 0.12 (Vorobyev et al. 2001) and used *n* = c(1:1), since no information about the  
274 proportion of photoreceptors is mentioned by literature. The  $\Delta S$  output, between an object and  
275 its background, was given in units of just noticeable difference (JND). Following Siddiqi et al.,  
276 (2004), we adopted three levels of detectability for the observers' visual systems modelled in  
277 this study: cryptic ( $\Delta S < 1$  JND), detectable ( $1 \text{ JND} \leq \Delta S \leq 3 \text{ JND}$ ) and highly detectable ( $\Delta S$   
278  $> 3 \text{ JND}$ ). The higher the chromatic contrast, the higher the colour difference between a male  
279 claw and the sandy background, favouring their detectability.

## 280 *Statistics*

281 Owing to the non-parametric nature of our visual modelling results and behavioural  
282 data (Shapiro-Wilk,  $P < 0.05$ ), chromatic contrast values generated by our visual model for

283 different observers (i.e. crabs, terns and plovers) were compared through Kruskal-Wallis tests,  
284 with Dunn's post hoc test and Bonferroni correction, while a Generalized linear model (Poisson  
285 model GZLM using a log link) was used to compare the different treatments of experiments 1  
286 and 2. The Poisson model was described by ratio rate (RR) and confidence interval (CI). All  
287 analyses were run on R statistics (R Core Team, 2017), and assumed  $\alpha = 0.05$ .

288

## 289 RESULTS

### 290 *Visual Modelling*

291 The output of our visual model (Figure 4), in which the natural colouration of 40 males  
292 was compared to the sandy substrate's colour, shows that claws of *L. leptodactyla* produce  
293 colour signals that vary from cryptic ( $\Delta S < 1$ ) to highly detectable ( $\Delta S > 3$  JND), according to  
294 the eye of the beholder. When taking colour cues into consideration, most measured enlarged  
295 claws were expected to be conspicuous against the sand when seen by terns (i.e., 39  
296 conspicuous claws out of 40) and by the plovers (i.e., 31 conspicuous claws out of 40), since  
297 most data points have fallen in the in the lighter grey area (i.e., detectable) or in the white area  
298 (i.e., highly detectable) of Figure 4.

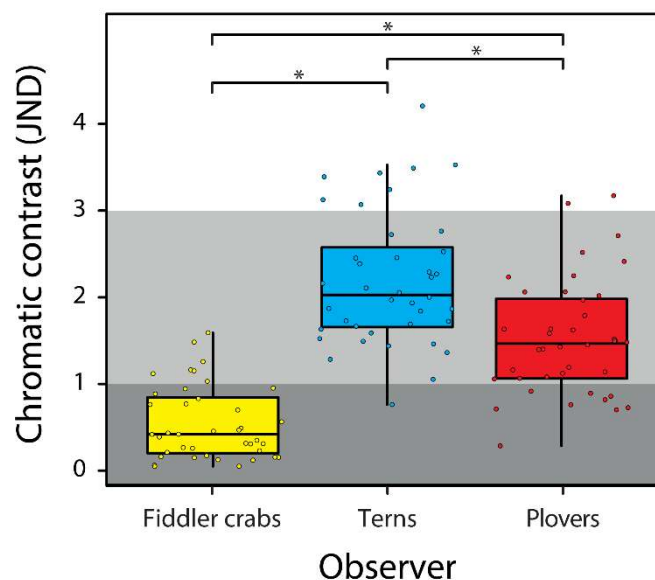

299 Figure 4. Chromatic contrast ( $\Delta S$ ) between the natural reflectance spectra measured from the hypertrophied claws  
300 of 40 male thin-fingered fiddler crabs (*Leptuca leptodactyla*) and the sandy substrate's reflectance spectrum,

301 modelled according to the visual systems of different observers. Dots represent individual values of chromatic  
302 contrast (in units of JND). Medians (black thick horizontal lines), interquartile ranges (boxes) and variability  
303 outside the upper and lower quartiles (whiskers) are also indicated. Thresholds of detectability are signalled by  
304 different grey areas. Dots that fall in the darker grey area are not detectable ( $\Delta S < 1$  JND), while dots that fall in  
305 the lighter grey area or white area are, respectively, detectable ( $1 \text{ JND} \leq \Delta S \leq 3 \text{ JND}$ ) and highly detectable ( $\Delta S$   
306  $> 3 \text{ JND}$ ). Bars with asterisks indicate statistically significant difference between observers.

307

308 In contrast, for fiddler crabs' conspecifics (e.g., females) only a minority (i.e., 7 out of  
309 40) of enlarged claws have fallen above the darker grey area of Figure 4, which indicates that  
310 33 males, out of 40, should not be able to attract the attention of females based on the colour  
311 of their claws alone. Seven out of 40 enlarged claws (17.5%), however, have fallen in the lighter  
312 grey area of detectability, while no claws were able to reach the white area of high detectability.

313 When we statistically compared chromatic contrast values generated by our visual  
314 model there was a significant difference in perceptual performance between different observers  
315 (Kruskal-Wallis:  $\chi^2_{(2)} = 70.376$ ;  $P < 0.0001$ ; Figure 4), in which birds statistically outperform  
316 fiddler crabs (Dunn's test:  $P < 0.0001$ ), while terns outperform plovers (Dunn's test:  $P < 0.001$ ).

317

### 318 *Mate Choice Experiments*

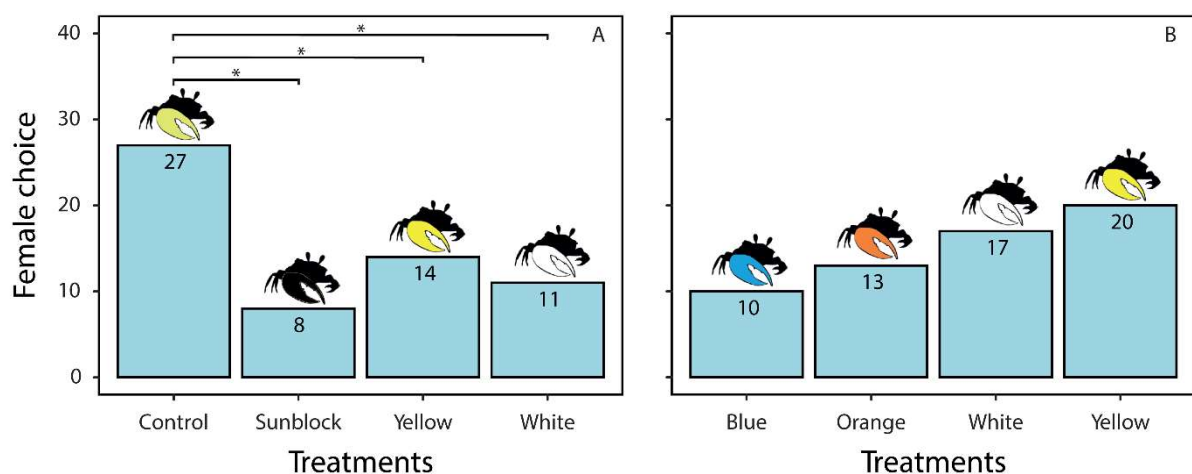

319 Figure 5. Mate choice by female thin-fingered fiddler crabs (*Leptuca leptodactyla*), when subjected to conditions  
320 of experiments 1 (A) and 2 (B). Treatments' details are given in Table 1. Bars with asterisks indicate statistically  
321 significant difference between treatments.

322

323 In Experiment 1, the Poisson model (GZLM) indicated that claw colouration influenced  
324 females preference ( $\chi^2 = 12.928$ ;  $P = 0.004$ ; Figure 5a), favouring males showing UV light  
325 reflection (i.e. males with claws of natural colouration) when compared to males that had their  
326 UV light reflection depleted by sunblock ( $RR = 0.2962$  [0.1 - 0.6];  $P = 0.002$ ), white paint ( $RR$   
327  $= 0.4074$  [0.19 - 0.79];  $P = 0.012$ ), or yellow paint ( $RR = 0.5185$  [0.26 - 0.97];  $P = 0.046$ ).  
328 While in Experiment 2, the Poisson model (GZLM) revealed no indication of a female sensory  
329 bias ( $\chi^2 = 3.9329$ ;  $P = 0.2688$ ; Figure 5b) being directed towards any specific claw colouration,  
330 when UV light reflection was depleted in all available treatments.

331

## 332 DISCUSSION

333 Our spectrophotometric data confirmed that the hypertrophied cheliped of thin-fingered  
334 fiddler crabs (*Leptuca leptodactyla*) significantly reflects UV light, while our behavioural  
335 results have proven that *L. leptodactyla* is also capable of discriminating the UV cues generated  
336 by conspecifics, which corroborates electrophysiological data gathered in a close species  
337 (*Leptuca thayeri* - Horch, 2002). Our findings parallel what has been found in an Australian  
338 species, the banana fiddler crab (*Austruca mjoebergi*), to which UV light reflection and  
339 preference has been associated with Fisherian explanations (Detto and Backwell 2009).

340 Yet, concerning non-UV cues, our data reveals a crucial difference in colour preference  
341 between Australian (*A. mjoebergi*) and American (*L. leptodactyla*) fiddler crabs. In the absence  
342 of ultraviolet information, while female Australian fiddler crabs are attracted by enlarged  
343 yellow (Detto et al. 2006; Dyson et al. 2020) and orange claws (Dyson et al. 2020), female



344 American fiddler crabs present no sensory bias to any hypertrophied claw colouration  
345 whatsoever, as shown by our second experiment.

346 *The Role of Claw Colouration in Fiddler Crabs*

347 *The private communication channel hypothesis*

348 On one hand, our visual modelling results do not support the existence of a private  
349 communication channel (Cummings et al. 2003), through which fiddler crabs could  
350 communicate without being seen by avian predators. In fact, our data show the opposite of  
351 what we predicted in our first hypothesis. Birds, which are responsible for most predation  
352 pressure suffered by fiddler crabs (Ribeiro et al. 2019), should outperform female fiddler crabs  
353 in using colour to identify males' hypertrophied claws on the sandy substrate. These results are  
354 in line with what has been reported by previous visual modelling studies conducted in other  
355 species of fiddler crabs (Hemmi et al. 2006; Cummings et al. 2008).

356 *The handicap principle hypothesis*

357 On the other hand, when considering our behavioural and visual modelling data, both  
358 seem to corroborate our second and third hypotheses. Previous allegations that male  
359 hypertrophied chelae would assist fiddler crab detection by humans (Jordão and Oliveira 2001),  
360 in addition to our modelling results predicting that birds should pose a threat to male fiddler  
361 crabs, demonstrate that males' hypertrophied claws might be regarded as handicaps (Zahavi  
362 1975). According to Zahavi's point of view (Zahavi and Zahavi 1997), the simple act of bearing  
363 a handicap (i.e., flamboyant claw) and not having been captured by predators would prove an  
364 individual's quality to their potential mates, as they propose it would happen with peacocks  
365 and other species displaying bright colourations. So, we could speculate that just a few high-  
366 quality males should be able to break claw crypticity and pay the costs for socio-sexual  
367 advertisement (i.e., honest signal), coping with the resulting enhancement in bird predation  
368 pressure.

369 Another, not mutually exclusive, possibility would be that colourful chelipeds could  
370 serve as anti-predatory honest signalling. In an exquisite behavioural study, Bildstein et al  
371 (1989) showed that the enlarged claw of male fiddler crabs reduces the likelihood of their  
372 capture by relatively large avian predators (i.e., white ibises), enhancing the chances that  
373 declawed males, or females, have of being chosen instead. These results are also in line with  
374 Zahavi's handicap principle, since white ibises would be choosing to attack prey that could not  
375 convey reliable proofs of their quality (i.e., fiddle crabs with small, or absent, chelae), in the  
376 same way wolves prefer to attack gazelles that run instead of jumping (Zahavi and Zahavi  
377 1997).

### 378 *Fisherian hypotheses*

379 Female choice in fiddler crabs might be linked to direct (i.e., resources, protection) and  
380 indirect (i.e., better sperm, good genes) benefits that are supplied by the males. A good example  
381 of direct benefits, that might be explored by females, is the existing relation between size of  
382 hypertrophied claws and quality of male burrows, with larger males occupying larger, safer,  
383 and more thermally stable burrows (Christy 1987). Concerning the potential indirect benefits  
384 of female choice, two dominant hypotheses have been recognized, Fisher's runaway selection  
385 hypothesis and the good-genes hypothesis (Anderson 1994).

386 Although our study has not evaluated if there is a genetic correlation between UV  
387 reflection by male claws and females' preference for UV cues, another way of interpreting our  
388 data would be that a Fisherian runaway selection is under action in fiddler crabs, selecting a  
389 strong female preference for UV colouration in correlation with a strong UV reflection by  
390 males' hypertrophied claws. According to the runaway hypotheses, in which a self-reinforcing  
391 process of ever-elaborating traits and preferences would take place, the mean values of traits  
392 and preferences would increase, while their variances and correlation should approach a stable  
393 equilibrium (Henshaw and Jones 2020). Our data, however, does not seem to support Detto

394 and Backwell (2009) Fisherian hypothesis, in which selection for UV reflection could be  
395 explained by the enhancement of male conspicuity with female concomitant attraction. Even  
396 though we have shown there to be a clear preference for UV signals among half of female  
397 fiddler crab population, our visual models predict that only the claws of a very few males (i.e.,  
398 17.5% of the population) would be conspicuous to their mates, whilst the remaining of them  
399 would be regarded as cryptic, something that goes against the logic of Fisher's classical  
400 runaway selection hypothesis.

401         Nevertheless, a recent reinterpretation of Fisher's original mathematical model predicts  
402 the occurrence of two qualitatively different outcomes besides the classical runaway: explosive  
403 runaway and fizzle away (Henshaw and Jones 2020).

404         According to the explosive runaway possibility, in case a large variance in preference  
405 overcame fiddler crab's female population, with some females showing a huge preference for  
406 male UV reflection while others could not care less about the same male trait, selection could  
407 be so strong that extreme outliers (i.e., those few males with conspicuous claws) in the original  
408 distributions could be strongly favoured, leading to a super exponentially increase in both the  
409 means and variances of traits and preferences, that could reach absurd values in very few  
410 generations. When we take the behavioural data from our first experiment and split every  
411 female into two categories, we can see that half of them choose an UV-reflecting male ( $n =$   
412 27), while the other half does not ( $n = 33$ ). If Henshaw and Jones (2020) correction of Fisher's  
413 mathematical model is accurate, this observed variance in female's preference for UV signals  
414 should start an ultra-rapid selection process with explosive increase in enlarged claws UV  
415 conspicuity, something that we also have not encountered in our sample.

416         At last, we conclude that the third Fisherian possible outcome, the fizzle away selection,  
417 in which variation in both traits and preferences would converge to zero, while the means of  
418 both traits and preferences would plateau after an initial period of increase (Henshaw and Jones

419 2020), also does not fit our results, inasmuch as we have shown variation to take place both on  
420 female preference for UV signals and UV reflectance by male enlarged claws.

421 Only further experimentation testing, for example, if there is a hereditarian  
422 cooccurrence between a higher UV reflection in males and a higher UV preference in related  
423 females, or how physiological attributes of male fiddler crabs correlate with their colour  
424 signals, especially if female choice leads to offspring of superior viability, can give us more  
425 conclusive answers about the evolution of UV reflection on fiddler crabs in light of Fisher's  
426 and the good-genes hypotheses.

#### 427 *Conclusions*

428 We failed to prove the existence of a UV private communication channel related to  
429 fiddler crabs' enlarged claw colouration. Our data endorse the view that male enlarged UV-  
430 reflecting chelae function as handicaps and might honestly signal quality to potential mates and  
431 predators. We also have shown that, similarly to Australian fiddler crabs, American fiddler  
432 crabs produce, discriminate, and prefer UV light signals. Would female preference for UV  
433 signals and UV reflection by male enlarged claws be widespread traits within fiddler crabs?  
434 Have the trait and the preference evolved only once, a long time ago, before the split of  
435 Gelasiminae into the Indo-West Pacific and American groups (Shih et al. 2016)? Or, instead,  
436 are they more recent acquisitions that have been independently selected in the American and  
437 Indo-West Pacific branches through convergent evolution? Future studies investigating traits  
438 and preferences in additional species of fiddler crabs can shed more light on how the evolution  
439 of UV signalling happened in this group.

440

#### 441 **ACKNOWLEDGMENT**

442 We are deeply indebted to J. Medeiros and L. V. Silva, for helping with the logistics of the  
443 project. We would also like to thank H. R. Silva, M. S. Capitulo, J. B. C. Neto and B. A. Souza

444 for assistance in data collection, Prof. Glenn W. Erickson (English native speaker) for  
445 reviewing our manuscript, and Prof. Natan Hart for sharing *Pavo cristatus* ocular transmission  
446 spectrum. This study was financed in part by the Coordenacao de Aperfeicoamento de Pessoal  
447 de Nivel Superior – Brasil CAPES (Finance Codes 001 and 043/2012), by Conselho Nacional  
448 de Desenvolvimento Cientifico e Tecnologico – Brasil (CNPq) (Finance Codes 478222/2006-  
449 8 and 474392/2013-9) and by Programa de Apoio aos Nucleos de Excelencia – FAPERN/CNPq  
450 (Finance Code 25674/2009). An Undergraduate Scientific Initiation Scholarship was granted  
451 to R.S.G., M.Sc. Scholarships were granted to D.J.A.S. and M.F.E., and a Researcher  
452 Scholarship was granted to D.M.A.P., all by Conselho Nacional de Desenvolvimento  
453 Cientifico e Tecnologico – Brasil CNPq.

454

## 455 REFERENCES

- 456 Andersson M. 1994. Sexual selection. Princeton UP, Princeton.
- 457 Andersson S, Örnborg J, Andersson M. 1998. Ultraviolet sexual dimorphism and assortative  
458 mating in blue tits. *Proc Biol Sci*; 265: 445–450.
- 459 Bildstein KL., McDowell SG, Brisbin IL. 1989. Consequences of sexual dimorphism in sand  
460 fiddler crabs, *Uca pugilator*: differential vulnerability to avian predation. *Anim Behav*;  
461 37: 133–139.
- 462 Byers J, Hebets E, Podos J. 2010. Female mate choice based upon male motor performance.  
463 *Anim Behav*; 79: 771–778.
- 464 Caro T. 2018. The functional significance of coloration in crabs. *Biol J Linn Soc Lond*; 18: 1–  
465 10.
- 466 Christy JH. 1987. Female choice and the breeding behavior of the fiddler crab *Uca beebei*. *J*  
467 *Crustac Biol*; 7: 624–635.

- 468 Crane J. 1975. Fiddle crabs of the world (Ocypodidae: genus *Uca*). Princeton UP,  
469 Princeton.
- 470 Cummings ME, Rosenthal GG, Ryan MJ. 2003. A private ultraviolet channel in visual  
471 communication. *Proc R Soc Lond B Biol Sci*; 270: 897–904.
- 472 Cummings ME, Jordão JM, Cronin TW, Oliveira RF. 2008. Visual ecology of the fiddler  
473 crab, *Uca tangeri*: effects of sex, viewer and background on conspicuousness. *Anim*  
474 *Behav*; 75: 175-188.
- 475 Cuthill IC, Allen WL, Arbuckle K, Caspers B, Chaplin G, Hauber ME, Hill GE, Jablonski  
476 NG, Jiggins CD, Kelber A, Mappes J, Marshall J, Merrill R, Osorio D, Prum R, Roberts  
477 NW, Roulin A, Rowland HM, Sherratt TN, Skelhorn J, Speed MP, Stevens M, Stoddard  
478 MC, Stuart-Fox D, Talas L, Tibbetts E, Caro T. 2017. The biology of color. *Science*;  
479 357: 6350.
- 480 Detto T, Backwell PRY, Hemmi JM, Zeil J. 2006. Visually mediated species and neighbour  
481 recognition in fiddler crabs (*Uca mjoebergi* and *Uca capricornis*). *Proc R Soc Lond B*  
482 *Biol Sci*; 273: 1661–1666.
- 483 Detto T, Backwell PRY. 2009. The fiddler crab *Uca mjoebergi* uses ultraviolet cues in mate  
484 choice but not aggressive interactions. *Anim Behav*; 78: 407–411.
- 485 Detto T. 2007. The fiddler crab *Uca mjoebergi* uses colour vision in mate choice. *Proc R Soc*  
486 *Lond B Biol Sci*; 274: 2785–2790.
- 487 Dyson ML, Backwell PRY. 2016. Alternative mating tactics and male mating success in two  
488 species of fiddler crab. *Behaviour*; 153: 1403–1418.
- 489 Dyson ML, Perez DM, Curran T, McCullough EL, Backwell PRY. 2020. The role of claw  
490 color in species recognition and mate choice in a fiddler crab. *Behav Ecol Sociobiol*; 74:  
491 116.

- 492 Hamilton WD, Zuk M. 1982. Heritable true fitness and bright birds: A role for parasites?  
493 *Science*; 218: 384–387.
- 494 Hart NS. 2002. Vision in the peafowl (Aves: *Pavo cristatus*). *J Exp Biol*; 205: 3925-3935.
- 495 Hart NS, Hunt DM. 2007. Avian visual pigments: Characteristics, spectral tuning, and  
496 evolution. *Am Nat*; 169: 7-26.
- 497 Hart NS, Partridge JC, Cuthill IC, Bennett AT. 2000. Visual pigments, oil droplets, ocular  
498 media and cone photoreceptor distribution in two species of passerine bird: The blue tit  
499 (*Parus caeruleus* L.) and the blackbird (*Turdus merula* L.). *J Comp Physiol A*; 186: 375-  
500 87.
- 501 Håstad O, Victorsson J, Ödeen A. 2005. Differences in color vision make passerines less  
502 conspicuous in the eyes of their predators. *Proc Natl Acad Sci USA*; 102:6391-4.
- 503 Hemmi JM, Marshall J, Pix W, Vorobyev M, Zeil J. 2006. The variable colours of the fiddler  
504 crab *Uca vomeris* and their relation to background and predation. *J Exp Biol*; 209: 4140-  
505 4153.
- 506 Henshaw JM, Jones AG. 2020. Fisher's lost model of runaway sexual selection. *Evolution*;  
507 74: 487-494.
- 508 Higham JP, Winters S. 2016. Color and mate choice in non-human animals. In: Elliot AJ,  
509 Fairchild MD, Franklin A (Eds.). *Handbook of Color Psychology*. Cambridge UP,  
510 Cambridge. 502-530.
- 511 Horch K, Salmon M, Forward R. 2002. Evidence for a two pigment visual system in the  
512 fiddler crab, *Uca thayeri*. *J Comp Physiol A*; 188: 493-499.
- 513 Jacobs GH. 2018. Photopigments and the dimensionality of animal color vision. *Neurosci*  
514 *Biobehav Rev*; 86: 108-130.

- 515 Jordão JM, Cronin TW, Oliveira RF. 2007. Spectral sensitivity of four species of fiddler  
516 crabs (*Uca pugnax*, *Uca pugilator*, *Uca vomeris* and *Uca tangeri*) measured by in situ  
517 microspectrophotometry. *J Exp Biol*; 210: 447–453.
- 518 Jordão JM, Oliveira RF. 2001. Major claws make male fiddler crabs more conspicuous to  
519 visual predators: A test using human observers. *Hydrobiologia*; 449: 241–247.
- 520 Land MF. 1999. The roles of head movements in the search and capture strategy of a tern  
521 (Aves, Laridae). *J Comp Physiol A*; 184: 265-272.
- 522 Maia R, Gruson H, Endler JA, White TE. 2019. Pavo 2: New tools for the spectral and spatial  
523 analysis of colour in R. *Methods Ecol Evol*; 10: 1097–1107.
- 524 Maier EJ, Bowmaker JK. 1993. Colour vision in the passeriform bird, *Leiothrix lutea*:  
525 correlation of visual pigment absorbance and oil droplet transmission with spectral  
526 sensitivity. *J. Comp. Physiol. A*; 172: 295–301.
- 527 Mowat FM, Petersen-Jones SM, Williamson H, Williams DL, Luthert PJ, Ali RR, Bainbridge  
528 JW. 2008. Topographical characterization of cone photoreceptors and the area centralis  
529 of the canine retina. *Mol Vis*; 14: 2518-27.
- 530 Murai M, Backwell PRY. 2006. A conspicuous courtship signal in the fiddler crab *Uca*  
531 *perplexa*: Female choice based on display structure. *Behav Ecol Sociobiol*; 60: 736–741.
- 532 Nabout JC, Bini LM, Diniz-Filho JAF. 2010. Global literature of fiddler crabs, genus *Uca*  
533 (Decapoda, Ocypodidae): trends and future directions. *Iheringia, Sér. Zool*; 100: 463-  
534 468.
- 535 Oliveira RF, Custodio MR. 1998. Claw size, waving display and female choice in the  
536 European fiddler crab, *Uca tangeri*. *Ethol Ecol Evol*; 10: 241-251.
- 537 Olsson P, Lind O, Kelber A. 2018. Chromatic and achromatic vision: Parameter choice and  
538 limitations for reliable model predictions. *Behav Ecol*; 29: 273–282.



- 539 R Core Team. 2017. R: A language and environment for statistical computing. R Foundation  
540 for Statistical Computing, Vienna.
- 541 Ribeiro PD, Iribarne OO, Jaureguy L, Navarro D, Bogazzi E. 2003. Variable sex-specific  
542 mortality due to shorebird predation on a fiddler crab. *Can J Zool*; 81: 1209-1221.
- 543 Ribeiro PD, Navarro DD, Jaureguy LM, Daleo P, Iribarne OO. 2019. Evaluating the potential  
544 impact of bird predation on the SW Atlantic fiddler crab *Leptuca uruguayensis*. *Helgol  
545 Mar Res*; 73: 6.
- 546 Schöne H. 1968. Agonistic and sexual display in aquatic and semi terrestrial brachyuran  
547 crabs. *Am Zool*; 8: 641-654.
- 548 Shih H-T, Ng PKL, Davie PJF, Schubart CD, Türkay M, Naderloo R, Jones DS, Liu MY.  
549 2016. Systematics of the family ocypodidae Rafinesque, 1815 (crustacea: brachyura),  
550 based on phylogenetic relationships, with a reorganization of subfamily rankings and a  
551 review of the taxonomic status of *Uca* Leach, 1814, sensu lato and its subgenera. *Raffles  
552 Bull Zool*; 64: 139-175.
- 553 Siddiqi A, Cronin TW, Loew ER, Vorobyev M, Summers K. 2004. Interspecific and  
554 intraspecific views of color signals in the strawberry poison frog *Dendrobates pumilio*. *J  
555 Exp Biol*; 207: 2471–2485.
- 556 Vorobyev M, Osorio D. 1998. Receptor noise as a determinant of colour thresholds. *Proc R  
557 Soc Lond B Biol Sci*; 265: 351–358.
- 558 Vorobyev M, Brandt R, Peitsch D, Laughlin SB, Menzel R. 2001. Colour thresholds and  
559 receptor noise: behaviour and physiology compared. *Vision Res*; 41: 639-653.
- 560 Zahavi A, Zahavi A. 1997. The handicap principle: A missing piece of Darwin's puzzle.  
561 Oxford UP, Oxford.
- 562 Zahavi A. 1975. Mate selection - A selection for a handicap. *J Theor Biol*; 53: 205–214.
- 563 Zeil J, Hemmi JM. 2006. The visual ecology of fiddler crabs. *J Comp Physiol A*; 192: 1-25.

564 APPENDIX

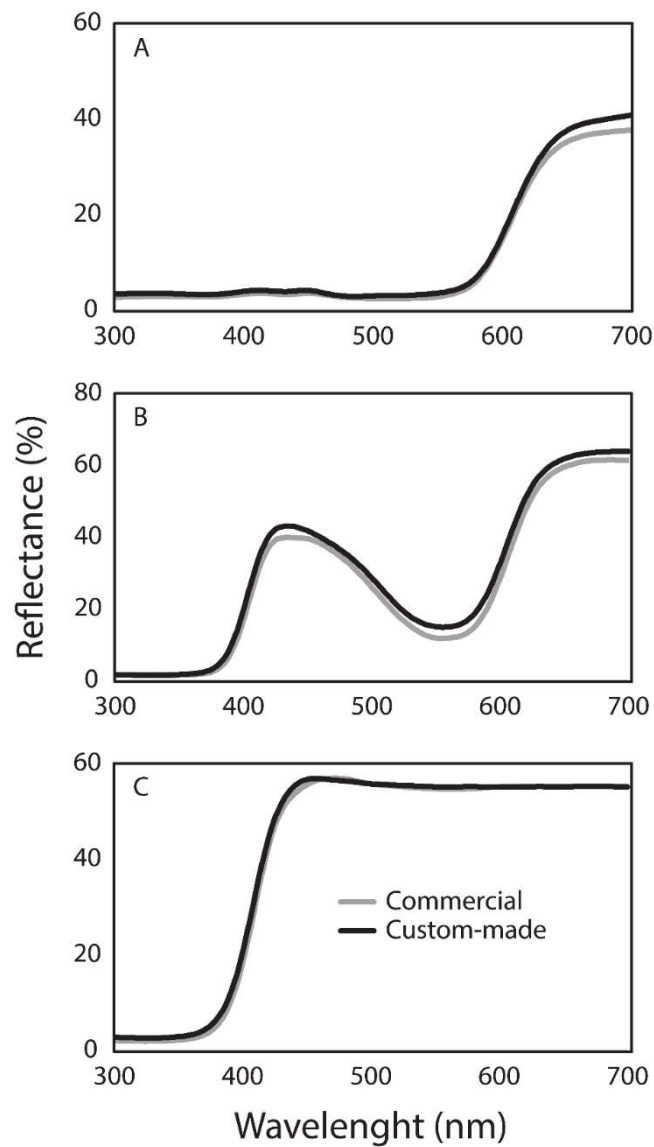

565 Appendix 1. Reflectance spectra, of three different natural surfaces, measured with aid of either a commercial  
566 reflectance probe holder (RPH-1, Ocean Optics Inc., Dunedin, Florida) or a custom-made, 3D printed,  
567 reflectance probe holder. A) Petal of *Delonix regia* (Bojer ex Hook.) Raf.; B) Petal of *Catharanthus roseus* (L.)  
568 G.Don; C) Petal of *Plumeria pudica* Jacq.
